# Supplementary material
Source: ML conference proceedings conference paper supplement (https://proceedings.mlr.press/v157/kitamura21a.html)
Supplement: Supplementary file 1 [file kitamura21a-supp.pdf]

## Appendix A. Proofs on the performance bound

For the following proof, we define the greedy policy and the Bellman operator regularized by Shannon entropy as well as KL divergence as  $\mathcal{G}_\mu^{\lambda, \tau}(q) = \operatorname{argmax}_{\pi \in \Delta_{\mathcal{A}}^S} (\langle \pi, q \rangle - \lambda \operatorname{KL}(\pi || \mu) + \tau \mathcal{H}(\pi))$  and  $T_{\pi || \mu}^{\lambda, \tau} q = r + \gamma P (\langle \pi, q \rangle - \lambda \operatorname{KL}(\pi || \mu)) + \tau \mathcal{H}(\pi)$ , respectively. We also note the following fact about the greedy policy (Vieillard et al., 2020a):

$$\mathcal{G}_\mu^{\lambda, \tau}(q) = \operatorname{argmax}_{\pi \in \Delta_{\mathcal{A}}^S} (\langle \pi, q \rangle - \lambda \operatorname{KL}(\pi || \mu) + \tau \mathcal{H}(\pi)) \propto \mu^{\frac{\lambda}{\lambda + \tau}} \exp \frac{1}{\lambda + \tau} q, \quad (14)$$

and we have the following maximum:

$$\max_{\pi \in \Delta_{\mathcal{A}}^S} (\langle \pi, q \rangle - \lambda \operatorname{KL}(\pi || \mu) + \tau \mathcal{H}(\pi)) = (\lambda + \tau) \ln \langle \mathbf{1}, \mu^{\frac{\lambda}{\lambda + \tau}} \exp \frac{q}{\lambda + \tau} \rangle. \quad (15)$$

Before going to the proof of Theorem 2, we provide the following proposition.

**Proposition 4** Define  $Z_k = \sum_{j=0}^k \eta_j$ ,  $h_0 = q_0$ , and  $h_k$  for  $k \geq 1$  as the average of past smoothed  $q$ -functions:  $h_k = \frac{1}{Z_k} \sum_{j=0}^k \eta_j q_j = \frac{Z_{k-1}}{Z_k} h_{k-1} + \frac{\eta_k}{Z_k} q_k$ . If  $\lambda_k > 0$  for all  $k$ , GVI is equivalent to the following iteration:

$$\begin{cases} \pi_{k+1} = \mathcal{G}^{0, \frac{1}{Z_k}}(h_k) \\ q_{k+1} = (T_{\pi_{k+1} || \pi_k}^{\frac{1}{\eta_k}, 0})^m q_k + \epsilon_{k+1} \\ h_{k+1} = \frac{1}{Z_{k+1}} \sum_{j=0}^{k+1} \eta_j q_j = \frac{Z_k}{Z_{k+1}} h_k + \frac{\eta_{k+1}}{Z_{k+1}} q_{k+1} \end{cases} . \quad (16)$$

**Proof** Using Eq. (14) and by direct induction, we have  $\pi_{k+1} \propto \pi_k \exp \eta_k q_k \propto \dots \propto \exp \sum_{j=0}^k \eta_j q_j = \exp Z_k h_k$ . Eq. (14) also provides  $\operatorname{argmax}_{\pi \in \Delta_{\mathcal{A}}^S} (\langle \pi, q \rangle + \tau \mathcal{H}(\pi)) \propto \exp(\frac{1}{\tau} q)$ . Hence,  $\pi_{k+1}$  satisfies  $\pi_{k+1} = \operatorname{argmax}_{\pi \in \Delta_{\mathcal{A}}^S} (\langle \pi, h_k \rangle + \frac{1}{Z_k} \mathcal{H}(\pi)) = \mathcal{G}^{0, \frac{1}{Z_k}}(h_k)$ .  $\blacksquare$

We now prove the error-bound of GVI using Eq. (16).

**Proof.** We first transform  $q_* - q_{\pi_{k+1}}$ , the difference between the optimal value function and the value function computed by Eq. (16), using the following useful lemma:

**Lemma 5 (Kakade and Langford (2002))** For any  $q \in \mathbb{R}^{\mathcal{S} \times \mathcal{A}}$  and  $\pi \in \Delta_{\mathcal{A}}^S$ , we have  $q_\pi - q = (I - \gamma P_\pi)^{-1} (T_\pi q - q)$ .

Using Lemma 5,  $q_* - q_{\pi_{k+1}}$  can be transformed as

$$\begin{aligned} q_* - q_{\pi_{k+1}} &= q_* - h_k + h_k - q_{\pi_{k+1}} \\ &= (I - \gamma P_{\pi_*})^{-1} (T_{\pi_*} h_k - h_k) - (I - \gamma P_{\pi_{k+1}})^{-1} (T_{\pi_{k+1}} h_k - h_k). \end{aligned} \quad (17)$$

Since the KL regularization vanishes after the iteration converges, the optimal policy must be deterministic, and hence  $\mathcal{H}(\pi_*) = 0$ . Since  $\pi_{k+1}$  is the regularized greedy policy, we have

$$\begin{aligned} \pi_{k+1} = \mathcal{G}^{0, \frac{1}{Z_k}}(h_k) &\Rightarrow \langle \pi_{k+1}, h_k \rangle + \frac{1}{Z_k} \mathcal{H}(\pi_{k+1}) \geq \langle \pi_*, h_k \rangle + \frac{1}{Z_k} \mathcal{H}(\pi_*) \\ &\Rightarrow T_{\pi_{k+1}}^{0, \frac{1}{Z_k}} h_k = T_{\pi_{k+1}} h_k + \gamma \frac{1}{Z_k} P \mathcal{H}(\pi_{k+1}) \geq T_{\pi_*} h_k. \end{aligned} \quad (18)$$

Using this with Eq. (5) and the fact that for any  $\pi$  the matrix  $(I - \gamma P_\pi)^{-1} = \sum_{t \geq 0} \gamma^t P_\pi^t$  is positive, we have the following inequality:

$$q_* - q_{\pi_{k+1}} \leq (I - \gamma P_{\pi_*})^{-1} (T_{\pi_{k+1}}^{0, \frac{1}{Z_k}} h_k - h_k) - (I - \gamma P_{\pi_{k+1}})^{-1} (T_{\pi_{k+1}}^{0, \frac{1}{Z_k}} h_k - h_k - \gamma \frac{1}{Z_k} P \mathcal{H}(\pi_{k+1})). \quad (19)$$

As for the residual  $T_{\pi_{k+1}}^{0, \frac{1}{Z_k}} h_k - h_k$ , we have the following useful lemma:

**Lemma 6** *For any  $k \geq 1$ , we have  $\eta_k T_{\pi_{k+1} | \pi_k}^{\frac{1}{Z_k}, 0} q_k = Z_k T_{\pi_{k+1}}^{0, \frac{1}{Z_k}} h_k - Z_{k-1} T_{\pi_k}^{0, \frac{1}{Z_{k-1}}} h_{k-1}$ . For  $k = 0$ , we have  $\eta_0 T_{\pi_1 | \pi_0}^{\frac{1}{Z_0}, 0} q_0 = Z_0 T_{\pi_1}^{0, \frac{1}{Z_0}} h_0 - \gamma P \mathcal{H}(\pi_0)$ .*

**Proof** Using the definition of  $\pi_k$  and  $h_k$ , the following equation holds.

$$\eta_k q_k + \ln \pi_k = \eta_k q_k + (Z_{k-1} h_{k-1} - \ln \langle \mathbf{1}, \exp Z_{k-1} h_{k-1} \rangle) = Z_k h_k - \ln \langle \mathbf{1}, \exp Z_{k-1} h_{k-1} \rangle. \quad (20)$$

Therefore, we have  $\langle \pi, \eta_k q_k \rangle - \text{KL}(\pi | \pi_k) = \langle \pi, Z_k h_k \rangle - \langle \pi, \ln \pi \rangle - \ln \langle \mathbf{1}, \exp Z_{k-1} h_{k-1} \rangle$ . From Eq. (15), the maximum of  $\langle \pi, Z_k h_k \rangle - \langle \pi, \ln \pi \rangle$  is  $\ln \langle \mathbf{1}, \exp Z_k h_k \rangle$ , and the maximizer is  $\pi_{k+1}$  from the definition. By substituting  $\pi_{k+1}$  to  $\pi$ , the following equation holds:

$$\langle \pi_{k+1}, \eta_k q_k \rangle - \text{KL}(\pi_{k+1} | \pi_k) = Z_k \frac{1}{Z_k} \ln \langle \mathbf{1}, \exp Z_k h_k \rangle - Z_{k-1} \frac{1}{Z_{k-1}} \ln \langle \mathbf{1}, \exp Z_{k-1} h_{k-1} \rangle. \quad (21)$$

From Eq. (15),  $\frac{1}{Z_k} \ln \langle \mathbf{1}, \exp Z_k h_k \rangle$  is the maximum of  $\langle \pi, h_k \rangle + \frac{1}{Z_k} \mathcal{H}(\pi)$ , and the associated maximizer is again  $\pi_{k+1}$ . Hence, the following equation holds:

$$\langle \pi_{k+1}, \eta_k q_k \rangle - \text{KL}(\pi_{k+1} | \pi_k) = Z_k \left( \langle \pi_{k+1}, h_k \rangle + \frac{1}{Z_k} \mathcal{H}(\pi_{k+1}) \right) - Z_{k-1} \left( \langle \pi_k, h_{k-1} \rangle + \frac{1}{Z_{k-1}} \mathcal{H}(\pi_k) \right). \quad (22)$$

Observing that  $\eta_k r = Z_k r - Z_{k-1} r$ , we have the first part of the result:  $\eta_k T_{\pi_{k+1} | \pi_k}^{\frac{1}{Z_k}, 0} q_k = Z_k T_{\pi_{k+1}}^{0, \frac{1}{Z_k}} h_k - Z_{k-1} T_{\pi_k}^{0, \frac{1}{Z_{k-1}}} h_{k-1}$ . For  $k = 0$ , using the fact that  $h_0 = q_0$ ,

$$\eta_0 T_{\pi_1 | \pi_0}^{\frac{1}{Z_0}, 0} q_0 = \eta_0 r + \gamma P (\langle \pi_1, \eta_0 h_0 \rangle) + \eta_0 \frac{1}{\eta_0} \mathcal{H}(\pi_1) + \eta_0 \frac{1}{\eta_0} \langle \pi_1, \ln \pi_0 \rangle = \eta_0 T_{\pi_1}^{0, \frac{1}{Z_0}} h_0 - \gamma P \mathcal{H}(\pi_0), \quad (23)$$

where we use in the last line the fact that  $\pi_0$ , being uniform,  $\langle \pi_1, \ln \pi_0 \rangle = -\ln |\mathcal{A}| = -\mathcal{H}(\pi_0)$ . This concludes the proof.  $\blacksquare$

Using Lemma 6, we can provide induction on  $h_k$ .

**Lemma 7** *Define  $E_k = -\sum_{j=1}^k \eta_j \epsilon_j$  and  $X_k = \sum_{j=0}^k (\eta_{j+1} - \eta_j) T_{\pi_{j+1} | \pi_j}^{\frac{1}{Z_j}, 0} q_j$ . For any  $k \geq 1$ , we have  $h_{k+1} = \frac{Z_k}{Z_{k+1}} T_{\pi_{k+1}}^{0, \frac{1}{Z_k}} h_k + \frac{1}{Z_{k+1}} (\eta_0 q_0 - E_{k+1} + X_k - \gamma P \mathcal{H}(\pi_0))$ .*

**Proof** Using the definition of  $h_k$ , Lemma 6, and the fact that  $q_{k+1} = T_{\pi_{k+1}|\pi_k}^{\frac{1}{\pi_k}, 0} q_k + \epsilon_{k+1}$ , we have

$$\begin{aligned}
 Z_{k+1}h_{k+1} &= \sum_{j=0}^{k+1} \eta_j q_j = \eta_0 q_0 + \eta_1 q_1 + \sum_{j=1}^k \eta_{j+1} q_{j+1} \\
 &= \eta_0 q_0 + ((\eta_1 - \eta_0) + \eta_0) T_{\pi_1|\pi_0}^{\frac{1}{\pi_0}, 0} q_0 + \eta_1 \epsilon_1 + \sum_{j=1}^k \left( ((\eta_{j+1} - \eta_j) + \eta_j) T_{\pi_{j+1}}^{\frac{1}{\pi_j}, 0} q_j + \eta_{j+1} \epsilon_{j+1} \right) \\
 &= \eta_0 q_0 + \left( Z_0 T_{\pi_1}^{0, \frac{1}{\pi_0}} h_0 - \gamma P\mathcal{H}(\pi_0) \right) + \sum_{j=1}^k \left( Z_j T_{\pi_{j+1}}^{0, \frac{1}{Z_j}} h_j - Z_{j-1} T_{\pi_j}^{0, \frac{1}{Z_{j-1}}} h_{j-1} \right) + X_k - E_{k+1} \\
 &= \eta_0 q_0 + X_k - E_{k+1} - \gamma P\mathcal{H}(\pi_0) + Z_k T_{\pi_{k+1}}^{0, \frac{1}{Z_k}} h_k \tag{24}
 \end{aligned}$$

$$\Leftrightarrow h_{k+1} = \frac{Z_k}{Z_{k+1}} T_{\pi_{k+1}}^{0, \frac{1}{Z_k}} h_k + \frac{1}{Z_{k+1}} (\eta_0 q_0 - E_{k+1} + X_k - \gamma P\mathcal{H}(\pi_0)). \tag{25}$$

■

Using Lemma 7 and the fact that  $Z_{k+1}h_{k+1} = Z_k h_k + \eta_{k+1} q_{k+1}$ , we have  $T_{\pi_{k+1}}^{0, \frac{1}{Z_k}} h_k - h_k = \frac{1}{Z_k} (\eta_{k+1} q_{k+1} - \eta_0 q_0 + E_{k+1} - X_k + \gamma P\mathcal{H}(\pi_0))$ . Injecting this last result into decomposition (19), we get

$$\begin{aligned}
 q_* - q_{\pi_{k+1}} &\leq (I - \gamma P_{\pi_*})^{-1} (T_{\pi_{k+1}}^{0, \frac{1}{Z_k}} h_k - h_k) - (I - \gamma P_{\pi_{k+1}})^{-1} (T_{\pi_{k+1}}^{0, \frac{1}{Z_k}} h_k - h_k - \gamma P\mathcal{H}(\pi_{k+1})) \\
 &\leq (I - \gamma P_{\pi_*})^{-1} \left( \frac{1}{Z_k} (Y_k + \gamma P\mathcal{H}(\pi_0)) \right) - (I - \gamma P_{\pi_{k+1}})^{-1} \left( \frac{1}{Z_k} (Y_k - \gamma P\mathcal{H}(\pi_{k+1})) \right), \tag{26}
 \end{aligned}$$

where we write  $Y_k = \eta_{k+1} q_{k+1} - \eta_0 q_0 + E_{k+1} - X_k$  for the uncluttered notation and the last inequality holds, since  $-(I - \gamma P_{\pi_{k+1}})^{-1} P\mathcal{H}(\pi_0) \leq 0$ . Next, using the fact that  $q_* - q_{\pi_{k+1}} \geq 0$  and rearranging terms, we have

$$\begin{aligned}
 q_* - q_{\pi_{k+1}} &\leq \left| ((I - \gamma P_{\pi_*})^{-1} - (I - \gamma P_{\pi_{k+1}})^{-1}) \frac{E_{k+1}}{Z_k} \right| \\
 &\quad + (I - \gamma P_{\pi_*})^{-1} \left| \frac{1}{Z_k} (\eta_{k+1} q_{k+1} - \eta_0 q_0 - X_k + \gamma P\mathcal{H}(\pi_0)) \right| \\
 &\quad + (I - \gamma P_{\pi_{k+1}})^{-1} \left| \frac{1}{Z_k} (\eta_{k+1} q_{k+1} - \eta_0 q_0 - X_k + \gamma P\mathcal{H}(\pi_{k+1})) \right|. \tag{27}
 \end{aligned}$$

From the assumptions  $\|q_k\|_\infty \leq q_{\max}$  for all  $k$ , we have  $\|X_k\|_\infty = \left\| \sum_{j=0}^k (\eta_{j+1} - \eta_j) T_{\pi_{j+1}|\pi_j}^{\frac{1}{\pi_j}, 0} q_j \right\|_\infty \leq q_{\max} \sum_{j=0}^k |\eta_{j+1} - \eta_j|$ . Combined with Eq. (27), we have

$$\|q_* - q_{\pi_{k+1}}\|_\infty \leq \frac{2}{(1 - \gamma)Z_k} \left( \left\| \sum_{j=1}^k \eta_j \epsilon_j \right\|_\infty + (\eta_{k+1} + \eta_0 + \sum_{j=0}^k |\eta_{j+1} - \eta_j|) q_{\max} + \gamma \ln |A| \right). \tag{28}$$

Table 1: Hyperparameters of algorithms in deep RL experiments

| Parameter                        | Value     |
|----------------------------------|-----------|
| <i>Shared</i>                    |           |
| optimizer                        | Adam      |
| learning rate                    | $10^{-4}$ |
| discount factor ( $\gamma$ )     | 0.99      |
| replay buffer size               | $10^6$    |
| number of hidden layers          | 2         |
| number of hidden units per layer | 256       |
| number of samples per minibatch  | 32        |
| activations                      | ReLU      |

## Appendix B. Proof of Theorem 3

Define for any  $k \geq 0$  the term  $q'_k = \lambda_{k+1}(q_k - \ln \pi_k)$ . By basic calculus, the evaluation step of Eq. 8 can be transformed as

$$\begin{aligned}
q_{k+1} &= \frac{r}{\lambda_{k+1}} + \ln \pi_{k+1} + \frac{\lambda_k}{\lambda_{k+1}} \gamma P \langle \pi_{k+1}, q_k - \ln \pi_{k+1} \rangle \\
\Leftrightarrow \lambda_{k+1} (q_{k+1} - \ln \pi_{k+1}) &= r + \gamma P \langle \pi_{k+1}, \lambda_k (q_k - \ln \pi_k) \rangle - \lambda_k \langle \pi_{k+1}, \ln \pi_{k+1} - \ln \pi_k \rangle \\
\Leftrightarrow q'_{k+1} &= r + \gamma P \langle \pi_{k+1}, q'_k \rangle - \lambda_k \text{KL}(\pi_{k+1} \| \pi_k). \tag{29}
\end{aligned}$$

For the greedy step, we have

$$\begin{aligned}
\operatorname{argmax}_{\pi} \langle \pi, q_k \rangle + \mathcal{H}(\pi) &\propto \exp(q_k) = \pi_k \exp\left(\frac{q'_k}{\lambda_k}\right) \\
&\propto \operatorname{argmax}_{\pi} \langle \pi, q'_k \rangle + \text{KL}(\pi \| \pi_k). \tag{30}
\end{aligned}$$

Therefore, we have shown that

$$\begin{aligned}
&\begin{cases} \pi_{k+1} = \operatorname{argmax}_{\pi \in \Delta_{\mathcal{A}}^S} \langle \pi, q_k \rangle + \mathcal{H}(\pi) \\ q_{k+1} = \ln \pi_{k+1} + \frac{r}{\lambda_{k+1}} + \frac{\lambda_k}{\lambda_{k+1}} \gamma P \langle \pi_{k+1}, q_k - \ln \pi_{k+1} \rangle \end{cases} \\
\Leftrightarrow &\begin{cases} \pi_{k+1} = \operatorname{argmax}_{\pi \in \Delta_{\mathcal{A}}^S} \langle \pi, q'_k \rangle - \lambda_k \text{KL}(\pi \| \pi_k) \\ q'_{k+1} = r + \gamma P \langle \pi_{k+1}, q'_k - \lambda_k \text{KL}(\pi_{k+1} \| \pi_k) \rangle \end{cases}. \tag{31}
\end{aligned}$$

## Appendix C. Hyperparameters

Table. 1 lists the hyperparameters used in the comparative evaluation in Section. 5.

## Appendix D. Maze Environment Details

For the tabular experiments, we use randomly generated  $5 \times 5$  mazes. Figure D shows a sample maze used in the experiment. The agent starts from a fixed position marked with  $S$  and can move to any of its neighboring states with success probability 0.9, or to a different random direction with probability 0.1. The agent receives +1 reward when it reaches the goal marked with  $G$ , and the environment terminates after 25 steps. The agent cannot enter the black tiles.

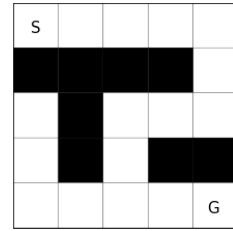

Figure 6: Example of a generated maze.
